# Supplementary material for: Expression profiles of differentially expressed circular RNAs and circRNA/miRNA/mRNA network in SH-SY5Y cells infected with Coxsackievirus B5
Source: Research Square preprint supplement (doi:10.21203/rs.3.rs-1524476/v1), 2022-04-11
Supplement: Supplementary file 1 [file 63b45ae198455e01caed9b3e.xlsx]

## Sheet: Sheet1
Table S2. Feature of identified circRNA genomic
Feature	Sample	Num
exon	CVB5_5Y1	7274
intron	CVB5_5Y1	187
intergenic	CVB5_5Y1	100
exon	CVB5_5Y2	7936
intron	CVB5_5Y2	234
intergenic	CVB5_5Y2	110
exon	CVB5_5Y3	7993
intron	CVB5_5Y3	201
intergenic	CVB5_5Y3	98
exon	Con_5Y1	9604
intron	Con_5Y1	267
intergenic	Con_5Y1	127
exon	Con_5Y2	10492
intron	Con_5Y2	322
intergenic	Con_5Y2	136
exon	Con_5Y3	8111
intron	Con_5Y3	203
intergenic	Con_5Y3	111
